# Supplementary material for: Application of Fourier-Transform Infrared Spectroscopy for the Assessment of Wine Spoilage Indicators: A Feasibility Study
Source: MDPI journal article supplement (doi:10.3390/molecules29081882), 2024-04-20
Supplement: s1 [file s1]

**Table S1:** Summary of the developed PLS models using the entire spectral region.

|                 | Calibration set |                                |                                 | Prediction set                 |              |                             |     |     |                              |
|-----------------|-----------------|--------------------------------|---------------------------------|--------------------------------|--------------|-----------------------------|-----|-----|------------------------------|
| Parameter       | LVs             | RMSEC<br>(mg L <sup>-1</sup> ) | RMSECV<br>(mg L <sup>-1</sup> ) | RMSEP<br>(mg L <sup>-1</sup> ) | RMSEP<br>(%) | R <sup>2</sup> <sub>P</sub> | RER | RPD | LOD<br>(mg L <sup>-1</sup> ) |
| Isoamyl alcohol | 3               | 60.38                          | 70.47                           | 54.79                          | 12.9         | 0.88                        | 7.7 | 2.2 | 164.4                        |
| Isobutanol      | 6               | 38.51                          | 63.28                           | 61.41                          | 12.0         | 0.74                        | 8.4 | 1.9 | 184.2                        |
| 1-hexanol       | 9               | 48.80                          | 77.54                           | 99.43                          | 19.1         | 0.66                        | 5.2 | 1.0 | 298.3                        |
| Butyric acid    | 7               | 38.99                          | 46.41                           | 39.30                          | 13.6         | 0.98                        | 7.3 | 2.2 | 117.9                        |
| Isobutyric acid | 6               | 33.37                          | 50.00                           | 53.90                          | 36.5         | 0.10                        | 2.7 | 0.9 | 161.7                        |
| Decanoic acid   | 4               | 53.48                          | 55.66                           | 61.16                          | 12.2         | 0.77                        | 8.2 | 2.1 | 186.5                        |
| Ethyl acetate   | 7               | 31.28                          | 43.54                           | 41.57                          | 19.4         | 0.71                        | 5.1 | 1.9 | 124.7                        |
| Acetoin         | 8               | 46.06                          | 79.11                           | 59.97                          | 12.1         | 0.80                        | 8.3 | 2.0 | 179.9                        |
| Furfural        | 6               | 30.10                          | 46.20                           | 47.78                          | 20.8         | 0.57                        | 4.8 | 1.5 | 143.3                        |
